# Supplementary material
Source: PubMed Central journal article supplement (PMC3311327)
Supplement: 1201333109_pnas.1201333109_SI.pdf [file 1201333109_pnas.1201333109_SI.pdf]

# Supporting Information

Rigort et al. 10.1073/pnas.1201333109

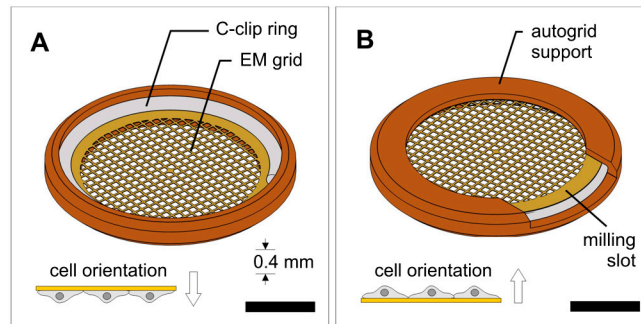

**Fig. S1.** Schematic drawings of the EM grid mounted into the modified autogrid support frame structure. (A) The frozen-hydrated EM grid is held by clamping a C-shaped clip ring into the autogrid support. The cells are facing the bottom side as indicated in (A). (B) View from the top side, exhibiting the cutout modification (milling slot) which enables FIB-milling under grazing angles of incidence. The cells are facing upwards. [Scale bars, (A and B) 1 mm].

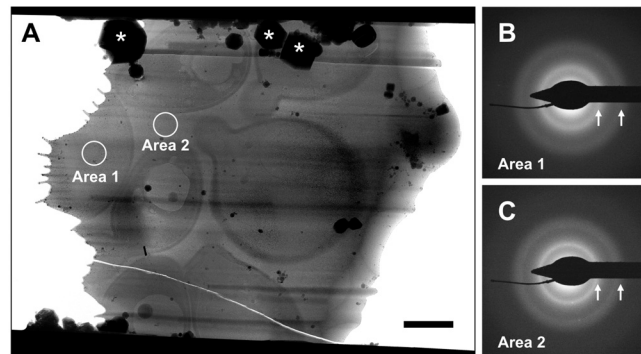

**Fig. S2.** Electron diffraction patterns of the lamella displaying its vitreous state. (A) Lamella obtained by cryoFIB micromachining and imaged under low-dose conditions in the transmission electron microscope. Various cross-sectioned *Saccharomyces cerevisiae* cells can be discerned. At the upper side, large surface frost particles can be recognized (asterisks). Stitched overview image optimized for contrast using Adobe Photoshop CS4. (B and C) Selected area electron diffraction patterns of the spots highlighted in (A). The pair of diffuse rings (arrows) is characteristic for amorphous ice and indicates the vitreous state of the lamella. [Scale bar, (A) 2  $\mu\text{m}$ ].

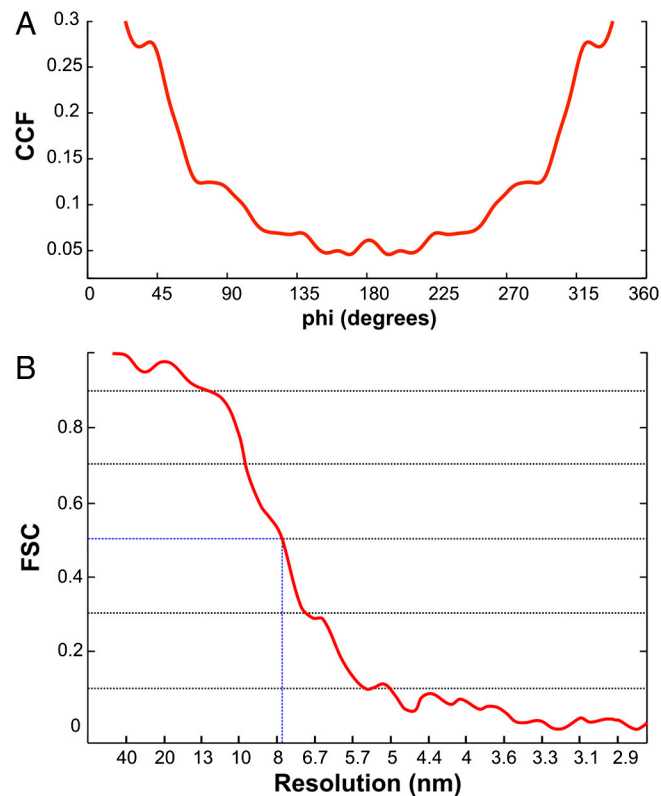

**Fig. S3.** Determination of symmetry and resolution of the nuclear pore complexes (NPC). (A) Averaged rotational correlation function of the three full particles (aligned without imposing symmetry). The local maxima at intervals of 45 degrees indicate an eightfold rotational symmetry. (B) Fourier shell correlation of the NPC protomer. The resolution as determined by the widely used 0.5-Fourier shell correlation (FSC) criterion is 7.9 nm.

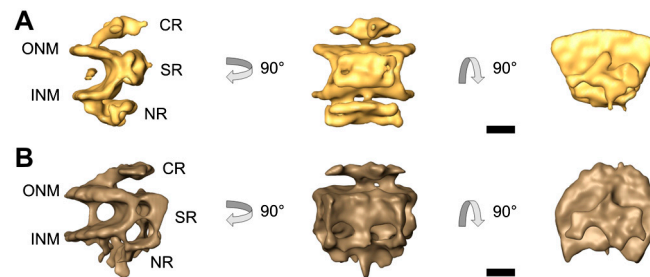

**Fig. S4.** Comparison of the *Dictyostelium discoideum* NPC structures obtained from a single tomogram of a FIB lamella (A) and multiple isolated nuclei (B); reported in ref. 1. ONM: outer nuclear membrane; INM: inner nuclear membrane; CR: cytoplasmic ring; SR: spoke ring; NR: nuclear ring. [Scale bar: (A and B) 25 nm].

1 Beck M, Lucic V, Forster F, Baumeister W, Medalia O (2007) Snapshots of nuclear pore complexes in action captured by cryo-electron tomography. *Nature* 449:611–615.

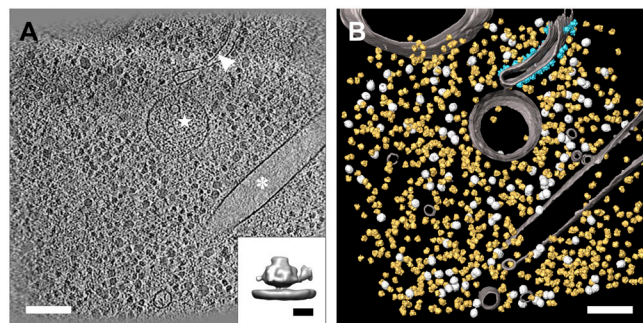

**Fig. S5.** Visualization of the crowded cytoplasm. (A) Tomographic slice showing the dense packing of macromolecular complexes in the cytoplasm (endoplasmic reticulum: white arrowhead; endosomal compartment: white asterisk; mitochondrion: white star). (B) Corresponding surface rendering color coded for membrane-bound ribosomes (blue), cytoplasmic ribosomes (yellow), and putative storage vesicles (white), obtained by subtomogram classification [inset in (A) shows the class average for membrane-bound ribosomes]. The displayed 200 nm thick tomographic volume covers  $0.31 \mu\text{m}^3$  of cellular space. 3.24% of this volume is occupied by ribosomes and 1.7% by larger macromolecular complexes of similar size (e.g. putative storage vesicles). Membrane-bound ribosomes account for only 0.41% of the mapped volume and 1.44% space is taken by the rough endoplasmic reticulum (cross-section). [Scale bar, (A) 200 nm].
